# Supplementary material
Source: publisher site journal article supplement (https://www.dovepress.com/article/155063)
Supplement: Supplementary file 1 [file get_supplementary_file.php]

# Demographic shift disproportionately increases the cancer burden in an aging nation – current and expected incidence and mortality in Hungary up to 2030

## Supplementary materials

Performing the age-period-model for generating projections

---

### Methods used for projection generation

Trends in incidence and mortality were predicted by the R software package Nordpred (<https://www.kreftregisteret.no/en/Research/Projects/Nordpred/Nordpred-software/>). Predictions were generated in a two-step process, including:

1. Fitting a model to the observed data
2. Based on the fitted model generating a projection.

In the first step, Nordpred fitted an age-period-cohort regression model to the observed data.

$$\text{Incidence/Mortality cases} = (\text{Age}) + (\text{Period}) + (\text{Cohort}) + (\text{Drift})$$

The variables implemented in our calculations:

Age (categorical variable): Coded age groups: 0-4 years =>1; 5-9 years =>2; ... 85+ years=>18

Period (categorical variable): Coded periods – 2001-2005 => 1; 2006-2010 =>2; 2011-2015=>3

Cohort (categorical variable): Derived variable from the maximum of age – age + period.

Drift (continuous variable): The linear effects of period and cohort cannot be estimated simultaneously as a result of collinearity between age, period and cohort, therefore a common linear trend (Drift) is estimated.

Estimation of the model is based on assumptions that observed cohort specific patterns and period effects will be similar in the future, therefore cohort and period effects are equal to the last estimated effects in the fitted model (additional details discussed in references [1, 2]).

---

### Description of the applied model

Inputs for model predictions are the new cancer cases diagnosed in 2001-2014, cancer mortality data in 1996-2015, observed population data in 1996-2014 and projected population size and structure up to 2030 in Hungary.

Data were aggregated into 5-year periods (mortality: 1996–2000; 2001-2005; 2006-2010; 2011–2015; incidence: 2001-2005; 2006-2010; 2011-2015) and 5-year age groups (0–4; 5–9; ...80–84; 85+).

A lowest age group for each cancer site was determined by considering the number of cases in each cell. Calculations for age groups below this age limit were based on average rates in the last 10 observed years. For fitting the regression model, we have used one or two age groups below the age limit in order to get an improved estimation for the younger cohorts.

Although the package is capable to do a goodness-of-fit test to select the best fitted model from the observation intervals, we used fixed periods in our regression models due to limited observation periods (three 5-year periods for incidence and four 5-years periods for mortality).

The Drift parameter was cut by 0%, 25% and 50% in the first, second and third 5-year period, respectively, to decrease the effect of current trends, because it is unlikely trends continue at the same rate. Furthermore, if there was a statistically significant change between observed periods, we had used the most recent 2 periods (last 10 years) to make projections for drift.

Applied age limits, observed periods and drift trends for males are listed below.

|                                          | Incidence |      |       | Mortality |      |       |
|------------------------------------------|-----------|------|-------|-----------|------|-------|
|                                          | Age       | Base | Trend | Age       | Base | Trend |
| <b>Male total</b>                        | 0-4       | 3    | T     | 0-4       | 4    | T     |
| Thyroid (C73)                            | 20-24     | 3    | A     | -         | -    | -     |
| Lung and Bronchus (C33-C34)              | 25-29     | 3    | T     | 35-39     | 4    | T     |
| Colorectal (C18-C21)                     | 25-29     | 3    | T     | 35-39     | 4    | T     |
| Prostate (C61)                           | 25-29     | 3    | T     | 55-59     | 4    | T     |
| Oral cavity and pharynx (C00-C14)        | 25-29     | 3    | T     | 40-44     | 4    | T     |
| Bladder (C67)                            | 25-29     | 3    | A     | 45-49     | 4    | A     |
| Stomach (C16)                            | 25-29     | 3    | T     | 40-44     | 4    | T     |
| Kidney (C64)                             | 25-29     | 3    | T     | 40-44     | 4    | T     |
| Pancreas (C25)                           | 25-29     | 3    | A     | 35-39     | 4    | A     |
| Larynx (C32)                             | 25-29     | 3    | A     | 45-49     | 4    | T     |
| Brain (C71)                              | 0-4       | 3    | A     | 0-4       | 4    | A     |
| Leukemia (C91-C95)                       | 0-4       | 3    | A     | 0-4       | 4    | A     |
| Melanoma of skin (C43)                   | 25-29     | 3    | A     | 35-39     | 4    | T     |
| Liver (C22)                              | 0-4       | 3    | T     | 45-49     | 4    | A     |
| Non-Hodgkin Lymphoma (C82-C85, C88, C96) | 0-4       | 3    | A     | 30-34     | 4    | A     |
| Hodgkin lymphoma (C81)                   | -         | -    | -     | 40-44     | 4    | T     |
| Multiple myeloma (C90)                   | -         | -    | -     | 50-54     | 4    | T     |
| Oesophagus (C15)                         | 40-44     | 3    | A     | 45-49     | 4    | T     |
| Testis (C62)                             | 25-29     | 3    | T     | 25-29     | 4    | T     |
| Gallbladder and billiary tract (C23-C24) | 45-49     | 3    | A     | 45-49     | 4    | T     |
| Bones and joints (C40-C41)               | 0-4       | 3    | A     | 20-24     | 4    | T     |
| Soft tissue (C47, C49)                   | 0-4       | 3    | T     | -         | -    | -     |

*Age: Lower limit of the age group., Base: Number of periods used, Trend: Average or recent trend was projected*

## Example of performing the age-period-cohort model for male thyroid cancer incidence

Fitting a model to the observed data:

A. Input: male thyroid cancer incidence data

|                      |       | Five-year periods |           |           |
|----------------------|-------|-------------------|-----------|-----------|
|                      |       | 2001-2005         | 2006-2010 | 2011-2015 |
| Five-year age groups | 00-04 | 0                 | 0         | 0         |
|                      | 05-09 | 3                 | 0         | 6         |
|                      | 10-14 | 5                 | 1         | 5         |
|                      | 15-19 | 8                 | 10        | 13        |
|                      | 20-24 | 16                | 12        | 9         |
|                      | 25-29 | 33                | 22        | 38        |
|                      | 30-34 | 31                | 47        | 58        |
|                      | 35-39 | 31                | 54        | 75        |
|                      | 40-44 | 33                | 45        | 81        |
|                      | 45-49 | 53                | 63        | 82        |
|                      | 50-54 | 76                | 55        | 78        |
|                      | 55-59 | 86                | 79        | 91        |
|                      | 60-64 | 62                | 88        | 93        |
|                      | 65-69 | 46                | 63        | 80        |
|                      | 70-74 | 56                | 62        | 60        |
|                      | 75-79 | 54                | 48        | 41        |
| 80-84                | 13    | 24                | 29        |           |
| 85+                  | 11    | 11                | 16        |           |

B. Input: observed and forecasted male population data

|                      |           | Five-year periods   |           |           |                       |           |           |
|----------------------|-----------|---------------------|-----------|-----------|-----------------------|-----------|-----------|
|                      |           | Observed population |           |           | Forecasted population |           |           |
|                      |           | 2001-2005           | 2006-2010 | 2011-2015 | 2016-2020             | 2021-2025 | 2026-2030 |
| Five-year age groups | 00-04     | 1 229 755           | 1 243 299 | 1 192 325 | 1 163 251             | 1 142 915 | 1 063 556 |
|                      | 05-09     | 1 388 377           | 1 240 958 | 1 250 715 | 1 187 056             | 1 161 167 | 1 141 236 |
|                      | 10-14     | 1 567 036           | 1 394 279 | 1 243 729 | 1 244 565             | 1 185 721 | 1 160 074 |
|                      | 15-19     | 1 651 950           | 1 577 272 | 1 441 807 | 1 243 234             | 1 242 675 | 1 184 155 |
|                      | 20-24     | 1 916 791           | 1 674 322 | 1 616 688 | 1 434 847             | 1 231 798 | 1 234 177 |
|                      | 25-29     | 2 115 357           | 1 936 376 | 1 602 246 | 1 557 512             | 1 391 030 | 1 199 480 |
|                      | 30-34     | 1 832 465           | 2 127 467 | 1 834 502 | 1 514 594             | 1 496 721 | 1 344 404 |
|                      | 35-39     | 1 600 198           | 1 834 730 | 2 102 931 | 1 761 663             | 1 459 530 | 1 453 596 |
|                      | 40-44     | 1 609 462           | 1 583 572 | 1 821 784 | 2 046 071             | 1 711 477 | 1 421 402 |
|                      | 45-49     | 1 944 914           | 1 558 840 | 1 563 638 | 1 759 944             | 1 984 903 | 1 664 434 |
| 50-54                | 1 750 608 | 1 833 908           | 1 512 557 | 1 489 757 | 1 683 118             | 1 909 886 |           |

|       |           |           |           |           |           |           |
|-------|-----------|-----------|-----------|-----------|-----------|-----------|
| 55-59 | 1 425 160 | 1 609 570 | 1 746 258 | 1 410 628 | 1 393 899 | 1 587 520 |
| 60-64 | 1 198 293 | 1 271 236 | 1 490 213 | 1 589 917 | 1 287 824 | 1 286 228 |
| 65-69 | 978 907   | 1 026 718 | 1 132 130 | 1 311 410 | 1 411 636 | 1 157 546 |
| 70-74 | 835 626   | 781 871   | 851 942   | 947 442   | 1 114 576 | 1 218 729 |
| 75-79 | 586 898   | 600 664   | 577 198   | 652 575   | 745 812   | 900 067   |
| 80-84 | 309 130   | 355 291   | 373 516   | 382 961   | 455 790   | 540 104   |
| 85+   | 162 749   | 202 796   | 229 511   | 276 396   | 327 595   | 414 713   |

C. Calculating a general linear model fitted to the observed data (Supplementary File Table 4)

Call: `glm(formula = Cases ~ as.factor(Age) + Period + as.factor(Period) + as.factor(Cohort) - 1, family = power5link, data = apcdata)`

Results of the general linear model

|                     |                     |                     |                     |                     |
|---------------------|---------------------|---------------------|---------------------|---------------------|
| as.factor(Age)2     | as.factor(Age)3     | as.factor(Age)4     | as.factor(Age)5     | as.factor(Age)6     |
| 0.074446            | 0.083792            | 0.095697            | 0.095689            | 0.111298            |
| as.factor(Age)7     | as.factor(Age)8     | as.factor(Age)9     | as.factor(Age)10    | as.factor(Age)11    |
| 0.120059            | 0.127060            | 0.133373            | 0.145449            | 0.147640            |
| as.factor(Age)12    | as.factor(Age)13    | as.factor(Age)14    | as.factor(Age)15    | as.factor(Age)16    |
| 0.152421            | 0.152282            | 0.149782            | 0.154532            | 0.153997            |
| as.factor(Age)17    | as.factor(Age)18    | Period              | as.factor(Period)2  | as.factor(Period)3  |
| 0.145489            | 0.142583            | 0.003964            | -0.001553           | NA                  |
| as.factor(Cohort)2  | as.factor(Cohort)3  | as.factor(Cohort)4  | as.factor(Cohort)5  | as.factor(Cohort)6  |
| -0.013043           | -0.003896           | -0.009885           | -0.014663           | -0.016122           |
| as.factor(Cohort)7  | as.factor(Cohort)8  | as.factor(Cohort)9  | as.factor(Cohort)10 | as.factor(Cohort)11 |
| -0.012759           | -0.019604           | -0.027103           | -0.020608           | -0.017287           |
| as.factor(Cohort)12 | as.factor(Cohort)13 | as.factor(Cohort)14 | as.factor(Cohort)15 | as.factor(Cohort)16 |
| -0.010707           | -0.008739           | -0.008142           | -0.007419           | -0.013209           |
| as.factor(Cohort)17 | as.factor(Cohort)18 | as.factor(Cohort)19 |                     |                     |
| -0.012473           | -0.018058           | NA                  |                     |                     |

*Degrees of Freedom:* 51 Total (i.e. Null); 15 Residual  
*Null Deviance:* 168400  
*Residual Deviance:* 23.73  
*AIC (Akaike Information Criterion):* 358.3

Generating a projection based on the fitted model

|                      |       | Five-year periods |           |           |                 |           |           |
|----------------------|-------|-------------------|-----------|-----------|-----------------|-----------|-----------|
|                      |       | Observed cases    |           |           | Predicted cases |           |           |
|                      |       | 2001-2005         | 2006-2010 | 2011-2015 | 2016-2020       | 2021-2025 | 2026-2030 |
| Five-year age groups | 00-04 | 0                 | 0         | 0         | 0               | 0         | 0         |
|                      | 05-09 | 3                 | 0         | 6         | 3               | 3         | 3         |
|                      | 10-14 | 5                 | 1         | 5         | 3               | 3         | 3         |
|                      | 15-19 | 8                 | 10        | 13        | 12              | 14        | 14        |
|                      | 20-24 | 16                | 12        | 9         | 14              | 14        | 15        |
|                      | 25-29 | 33                | 22        | 38        | 30              | 31        | 29        |
|                      | 30-34 | 31                | 47        | 58        | 53              | 47        | 47        |
|                      | 35-39 | 31                | 54        | 75        | 78              | 74        | 64        |
|                      | 40-44 | 33                | 45        | 81        | 112             | 106       | 97        |
|                      | 45-49 | 53                | 63        | 82        | 136             | 181       | 165       |
|                      | 50-54 | 76                | 55        | 78        | 100             | 154       | 199       |
|                      | 55-59 | 86                | 79        | 91        | 99              | 121       | 180       |
|                      | 60-64 | 62                | 88        | 93        | 89              | 99        | 118       |
|                      | 65-69 | 46                | 63        | 80        | 87              | 80        | 88        |
|                      | 70-74 | 56                | 62        | 60        | 92              | 96        | 87        |
| 75-79                | 54    | 48                | 41        | 56        | 78              | 81        |           |
| 80-84                | 13    | 24                | 29        | 26        | 33              | 46        |           |
| 85+                  | 11    | 11                | 16        | 20        | 22              | 29        |           |

**Prediction done with:**

|                                                |              |
|------------------------------------------------|--------------|
| Number of periods predicted (nopred):          | 3            |
| Trend used in predictions (cuttrend):          | 0, 0.25, 0.5 |
| Number of periods used in estimate (noperiod): | 3            |
| P-value for goodness of fit:                   | 0.0698       |
| Used recent (recent):                          | FALSE        |
| P-value for recent:                            | 0.4062       |
| First age group used (startuseage):            | 4            |
| First age group estimated (startestage):       | 2            |

**References:**

1. Moller, B., et al., *Prediction of cancer incidence in the Nordic countries: empirical comparison of different approaches*. Stat Med, 2003. **22**(17): p. 2751-66.

2. Moller, B., H. Weedon-Fekjaer, and T. Haldorsen, *Empirical evaluation of prediction intervals for cancer incidence*. BMC Med Res Methodol, 2005. 5: p. 21.
