# Supplementary material
Source: publisher site journal article supplement (https://www.dovepress.com/article/155063)
Supplement: Supplementary file 2 [file get_supplementary_file.php]

**Table S1.** Cancer incidence as crude rates (A) and age standardized ratios (ASR) standardized to the Hungarian population based on the 2011 census (B), ASR standardized to the 2013 European Standard Population (ESP 2013) (C), and ASR standardized to the 1976 ESP (D) of major cancer types by sex.

A)

| Male                                     | Incidence (crude rate) |         |         |       |       |       | Female                                   | Incidence (crude rate) |         |         |       |       |       |
|------------------------------------------|------------------------|---------|---------|-------|-------|-------|------------------------------------------|------------------------|---------|---------|-------|-------|-------|
| Site                                     | 2001-05                | 2006-10 | 2011-15 | 2020  | 2025  | 2030  | Site                                     | 2001-05                | 2006-10 | 2011-15 | 2020  | 2025  | 2030  |
| Lung and Bronchus (C33-C34)              | 156.7                  | 150.5   | 145.0   | 141.7 | 134.8 | 128.5 | Breast (C50)                             | 138.4                  | 131.2   | 147.8   | 168.5 | 182.9 | 192.0 |
| Colorectal (C18-C21)                     | 101.6                  | 108.4   | 121.3   | 142.9 | 159.4 | 174.1 | Colorectal (C18-C21)                     | 82.1                   | 83.6    | 92.5    | 106.0 | 116.8 | 126.0 |
| Prostate (C61)                           | 68.9                   | 75.6    | 93.7    | 123.7 | 149.2 | 171.5 | Lung and Bronchus (C33-C34)              | 70.5                   | 77.0    | 86.5    | 96.0  | 102.6 | 107.1 |
| Oral cavity and pharynx (C00-C14)        | 61.6                   | 58.0    | 57.2    | 55.6  | 52.6  | 49.8  | Corpus uteri (C54)                       | 23.7                   | 24.1    | 29.8    | 34.0  | 36.9  | 39.1  |
| Bladder (C67)                            | 36.9                   | 41.1    | 48.1    | 57.7  | 64.8  | 70.8  | Cervix uteri (C53)                       | 23.4                   | 19.7    | 21.5    | 23.3  | 24.1  | 24.4  |
| Stomach (C16)                            | 30.6                   | 29.5    | 28.2    | 28.9  | 29.2  | 30.0  | Ovary (C56)                              | 22.7                   | 22.4    | 26.1    | 28.5  | 30.1  | 31.0  |
| Larynx (C32)                             | 23.9                   | 21.6    | 21.7    | 20.0  | 17.7  | 15.7  | Stomach (C16)                            | 20.8                   | 20.3    | 19.9    | 20.4  | 21.0  | 22.1  |
| Kidney (C64)                             | 22.1                   | 24.4    | 28.6    | 33.7  | 37.5  | 40.5  | Pancreas (C25)                           | 17.3                   | 22.0    | 25.5    | 31.8  | 37.2  | 41.9  |
| Pancreas (C25)                           | 20.1                   | 24.1    | 26.8    | 32.1  | 36.1  | 39.3  | Oral cavity and pharynx (C00-C14)        | 16.3                   | 17.0    | 19.6    | 22.3  | 24.4  | 26.2  |
| Brain (C71)                              | 18.0                   | 19.4    | 19.8    | 21.2  | 21.8  | 22.2  | Brain (C71)                              | 16.1                   | 16.4    | 17.2    | 18.1  | 18.9  | 19.5  |
| Leukemia (C91-C95)                       | 17.3                   | 17.5    | 21.3    | 24.8  | 27.8  | 30.6  | Melanoma of skin (C43)                   | 16.0                   | 19.4    | 23.1    | 27.5  | 30.7  | 32.9  |
| Esophagus (C15)                          | 15.2                   | 14.3    | 14.2    | 13.6  | 12.6  | 11.9  | Bladder (C67)                            | 14.7                   | 16.1    | 20.5    | 24.7  | 28.0  | 30.6  |
| Melanoma of skin (C43)                   | 14.5                   | 18.7    | 23.4    | 30.1  | 35.3  | 39.6  | Leukemia (C91-C95)                       | 14.6                   | 14.7    | 17.3    | 19.1  | 20.6  | 21.9  |
| Liver (C22)                              | 13.8                   | 17.9    | 20.2    | 23.3  | 25.8  | 28.0  | Kidney (C64)                             | 14.5                   | 16.1    | 18.7    | 21.8  | 24.5  | 26.4  |
| Non-Hodgkin Lymphoma (C82-C85, C88, C96) | 13.5                   | 15.6    | 18.1    | 21.5  | 24.3  | 26.6  | Gallbladder and biliary tract (C23-C24)  | 12.5                   | 12.9    | 12.7    | 13.4  | 14.2  | 15.4  |
| Testis (C62)                             | 10.5                   | 11.9    | 12.7    | 13.2  | 13.4  | 13.5  | Non-Hodgkin Lymphoma (C82-C85, C88, C96) | 12.7                   | 15.1    | 18.8    | 23.0  | 26.4  | 29.1  |
| Gallbladder and biliary tract (C23-C24)  | 7.9                    | 8.9     | 9.8     | 11.8  | 13.4  | 15.1  | Liver (C22)                              | 9.2                    | 11.4    | 12.2    | 13.8  | 15.1  | 16.4  |
| Soft tissue (C47, C49)                   | 7.6                    | 12.5    | 15.7    | 20.8  | 25.3  | 29.4  | Soft tissue (C47, C49)                   | 7.0                    | 11.6    | 14.7    | 18.9  | 22.9  | 26.5  |
| Bones and joints (C40-C41)               | 7.4                    | 8.3     | 7.3     | 7.6   | 7.7   | 7.9   | Thyroid (C73)                            | 7.2                    | 8.0     | 11.1    | 13.6  | 16.0  | 17.9  |
| Thyroid (C73)                            | 2.6                    | 2.9     | 3.6     | 4.5   | 5.2   | 5.8   | Bones and joints (C40-C41)               | 5.8                    | 6.4     | 5.8     | 5.9   | 6.1   | 6.2   |

B)

| Male                        | Incidence, ASR (based on Hungarian male population, 2011 census) |         |         |       |       |       | Female                      | Incidence, ASR (based on Hungarian female population, 2011 census) |         |         |       |       |       |
|-----------------------------|------------------------------------------------------------------|---------|---------|-------|-------|-------|-----------------------------|--------------------------------------------------------------------|---------|---------|-------|-------|-------|
| Site                        | 2001-05                                                          | 2006-10 | 2011-15 | 2020  | 2025  | 2030  | Site                        | 2001-05                                                            | 2006-10 | 2011-15 | 2020  | 2025  | 2030  |
| Lung and Bronchus (C33-C34) | 173.5                                                            | 160.4   | 144.5   | 125.4 | 108.3 | 93.8  | Breast (C50)                | 147.9                                                              | 136.3   | 146.7   | 156.5 | 162.7 | 164.8 |
| Colorectal (C18-C21)        | 113.8                                                            | 115.7   | 120.4   | 124.2 | 125.7 | 125.0 | Colorectal (C18-C21)        | 90.8                                                               | 87.4    | 91.3    | 95.3  | 98.0  | 99.0  |
| Prostate (C61)              | 77.9                                                             | 81.0    | 92.7    | 103.8 | 111.4 | 114.8 | Lung and Bronchus (C33-C34) | 75.8                                                               | 80.1    | 85.9    | 88.5  | 88.8  | 86.6  |

|                                          |      |      |      |      |      |      |                                          |      |      |      |      |      |      |
|------------------------------------------|------|------|------|------|------|------|------------------------------------------|------|------|------|------|------|------|
| Oral cavity and pharynx (C00–C14)        | 66.0 | 60.9 | 57.3 | 51.4 | 45.0 | 39.3 | Corpus uteri (C54)                       | 25.7 | 25.1 | 29.6 | 31.5 | 32.9 | 33.6 |
| Bladder (C67)                            | 41.4 | 43.8 | 47.7 | 49.5 | 50.0 | 49.2 | Cervix uteri (C53)                       | 24.5 | 20.3 | 21.4 | 22.4 | 22.9 | 23.0 |
| Stomach (C16)                            | 34.2 | 31.3 | 28.0 | 25.1 | 22.8 | 21.0 | Ovary (C56)                              | 24.3 | 23.1 | 25.9 | 26.6 | 26.9 | 26.9 |
| Kidney (C64)                             | 24.4 | 25.9 | 28.4 | 29.9 | 30.7 | 30.7 | Stomach (C16)                            | 23.2 | 21.3 | 19.6 | 18.2 | 17.3 | 16.8 |
| Pancreas (C25)                           | 22.4 | 25.6 | 26.7 | 28.2 | 28.8 | 28.4 | Pancreas (C25)                           | 19.3 | 23.0 | 25.2 | 28.4 | 30.9 | 32.2 |
| Larynx (C32)                             | 25.8 | 22.8 | 21.7 | 18.4 | 15.1 | 12.2 | Oral cavity and pharynx (C00–C14)        | 17.3 | 17.5 | 19.6 | 20.9 | 21.4 | 21.3 |
| Brain (C71)                              | 19.4 | 20.3 | 19.7 | 19.2 | 18.5 | 17.6 | Brain (C71)                              | 17.0 | 16.9 | 17.1 | 16.9 | 16.7 | 16.3 |
| Leukemia (C91-C95)                       | 19.0 | 18.4 | 21.1 | 21.9 | 22.3 | 22.5 | Melanoma of skin (C43)                   | 17.0 | 19.9 | 22.9 | 25.9 | 27.8 | 28.7 |
| Melanoma of skin (C43)                   | 16.0 | 19.7 | 23.2 | 26.9 | 29.4 | 30.5 | Bladder (C67)                            | 16.2 | 16.9 | 20.3 | 22.2 | 23.4 | 23.9 |
| Liver (C22)                              | 15.3 | 18.9 | 20.1 | 20.4 | 20.4 | 20.0 | Leukemia (C91-C95)                       | 15.9 | 15.3 | 17.1 | 17.3 | 17.4 | 17.1 |
| Non-Hodgkin Lymphoma (C82-C85, C88, C96) | 14.7 | 16.4 | 18.0 | 19.4 | 20.3 | 20.6 | Kidney (C64)                             | 15.7 | 16.8 | 18.6 | 20.0 | 21.2 | 21.7 |
| Esophagus (C15)                          | 16.5 | 15.1 | 14.3 | 12.2 | 10.3 | 8.7  | Gallbladder and biliary tract (C23-C24)  | 14.1 | 13.5 | 12.5 | 12.0 | 11.9 | 12.1 |
| Testis (C62)                             | 10.4 | 11.6 | 12.7 | 13.7 | 14.2 | 14.5 | Non-Hodgkin Lymphoma (C82-C85, C88, C96) | 13.6 | 15.6 | 18.7 | 21.1 | 22.7 | 23.4 |
| Gallbladder and biliary tract (C23-C24)  | 8.9  | 9.5  | 9.8  | 10.2 | 10.6 | 10.8 | Liver (C22)                              | 10.1 | 11.9 | 12.1 | 12.6 | 12.9 | 12.9 |
| Soft tissue (C47, C49)                   | 8.2  | 13.1 | 15.6 | 18.3 | 20.0 | 20.8 | Soft tissue (C47, C49)                   | 7.6  | 12.1 | 14.5 | 17.6 | 20.2 | 22.2 |
| Bones and joints (C40-C41)               | 8.0  | 8.6  | 7.3  | 7.0  | 6.7  | 6.6  | Thyroid (C73)                            | 7.5  | 8.2  | 11.1 | 13.2 | 15.4 | 17.5 |
| Thyroid (C73)                            | 2.7  | 3.0  | 3.6  | 4.2  | 4.8  | 5.3  | Bones and joints (C40-C41)               | 6.1  | 6.5  | 5.7  | 5.5  | 5.4  | 5.3  |

C)

| Male                                     | Incidence, ASR (ESP 2013) |         |         |       |       |       | Female                                   | Incidence, ASR (ESP 2013) |         |         |       |       |       |
|------------------------------------------|---------------------------|---------|---------|-------|-------|-------|------------------------------------------|---------------------------|---------|---------|-------|-------|-------|
|                                          | 2001-05                   | 2006-10 | 2011-15 | 2020  | 2025  | 2030  |                                          | 2001-05                   | 2006-10 | 2011-15 | 2020  | 2025  | 2030  |
| Site                                     |                           |         |         |       |       |       | Site                                     |                           |         |         |       |       |       |
| Lung and Bronchus (C33-C34)              | 204.3                     | 190.2   | 173.3   | 154.2 | 137.6 | 122.8 | Breast (C50)                             | 141.0                     | 130.0   | 139.9   | 149.7 | 156.1 | 158.6 |
| Colorectal (C18–C21)                     | 147.4                     | 150.0   | 157.4   | 163.1 | 166.6 | 167.3 | Colorectal (C18–C21)                     | 85.8                      | 82.8    | 86.5    | 90.2  | 92.9  | 93.9  |
| Prostate (C61)                           | 110.2                     | 111.1   | 129.1   | 145.4 | 158.1 | 165.2 | Lung and Bronchus (C33-C34)              | 72.2                      | 75.7    | 80.6    | 83.0  | 83.5  | 81.6  |
| Oral cavity and pharynx (C00–C14)        | 71.4                      | 65.8    | 63.0    | 57.7  | 52.4  | 47.2  | Corpus uteri (C54)                       | 24.2                      | 23.6    | 27.9    | 29.8  | 31.0  | 31.6  |
| Bladder (C67)                            | 54.3                      | 57.6    | 63.6    | 66.9  | 68.6  | 68.3  | Cervix uteri (C53)                       | 23.8                      | 19.7    | 20.6    | 21.6  | 22.0  | 22.0  |
| Stomach (C16)                            | 45.4                      | 41.7    | 37.8    | 34.0  | 31.1  | 29.0  | Ovary (C56)                              | 23.1                      | 22.1    | 24.7    | 25.4  | 25.7  | 25.7  |
| Kidney (C64)                             | 29.2                      | 30.9    | 34.7    | 37.0  | 38.3  | 38.6  | Stomach (C16)                            | 22.0                      | 20.2    | 18.6    | 17.2  | 16.4  | 15.9  |
| Pancreas (C25)                           | 28.2                      | 31.9    | 33.8    | 36.2  | 37.7  | 37.8  | Pancreas (C25)                           | 18.3                      | 21.8    | 23.9    | 26.9  | 29.2  | 30.5  |
| Larynx (C32)                             | 27.9                      | 24.8    | 23.9    | 20.8  | 17.7  | 14.9  | Oral cavity and pharynx (C00–C14)        | 16.7                      | 16.6    | 18.3    | 19.6  | 20.2  | 20.3  |
| Leukemia (C91-C95)                       | 24.2                      | 23.6    | 27.5    | 28.7  | 29.4  | 29.7  | Brain (C71)                              | 16.4                      | 16.1    | 16.3    | 16.1  | 15.9  | 15.5  |
| Brain (C71)                              | 21.6                      | 23.1    | 22.8    | 22.8  | 22.2  | 21.3  | Melanoma of skin (C43)                   | 16.3                      | 19.1    | 22.0    | 24.9  | 26.8  | 27.7  |
| Liver (C22)                              | 19.2                      | 23.5    | 25.3    | 26.0  | 26.7  | 26.9  | Bladder (C67)                            | 15.3                      | 15.9    | 19.1    | 21.0  | 22.2  | 22.6  |
| Melanoma of skin (C43)                   | 18.9                      | 23.5    | 28.8    | 33.8  | 36.9  | 38.5  | Leukemia (C91-C95)                       | 15.2                      | 14.7    | 16.4    | 16.6  | 16.6  | 16.4  |
| Esophagus (C15)                          | 18.5                      | 17.2    | 16.3    | 14.7  | 12.9  | 11.3  | Kidney (C64)                             | 15.0                      | 15.9    | 17.6    | 19.0  | 20.1  | 20.5  |
| Non-Hodgkin Lymphoma (C82-C85, C88, C96) | 17.3                      | 19.5    | 21.9    | 23.8  | 25.0  | 25.6  | Gallbladder and biliary tract (C23-C24)  | 13.4                      | 12.8    | 11.8    | 11.4  | 11.2  | 11.4  |
| Gallbladder and biliary tract (C23-C24)  | 12.1                      | 12.6    | 13.2    | 13.7  | 14.1  | 14.6  | Non-Hodgkin Lymphoma (C82-C85, C88, C96) | 13.0                      | 14.9    | 17.8    | 20.0  | 21.6  | 22.2  |

|                            |     |      |      |      |      |      |                            |     |      |      |      |      |      |
|----------------------------|-----|------|------|------|------|------|----------------------------|-----|------|------|------|------|------|
| Soft tissue (C47, C49)     | 9.8 | 16.2 | 19.8 | 24.1 | 27.0 | 28.7 | Liver (C22)                | 9.6 | 11.3 | 11.5 | 11.9 | 12.1 | 12.2 |
| Testis (C62)               | 9.6 | 10.7 | 11.8 | 12.7 | 13.4 | 13.7 | Soft tissue (C47, C49)     | 7.3 | 11.6 | 14.0 | 16.9 | 19.4 | 21.3 |
| Bones and joints (C40-C41) | 9.2 | 10.0 | 8.6  | 8.2  | 7.8  | 7.6  | Thyroid (C73)              | 7.2 | 7.9  | 10.8 | 12.9 | 15.0 | 16.9 |
| Thyroid (C73)              | 3.0 | 3.3  | 3.9  | 4.5  | 5.1  | 5.6  | Bones and joints (C40-C41) | 5.8 | 6.3  | 5.5  | 5.3  | 5.2  | 5.1  |

**D)**

| Male                                     | Incidence, ASR (ESP 1976) |         |         |         |       |       | Female                                   | Incidence, ASR (ESP 1976) |       |         |         |         |       |
|------------------------------------------|---------------------------|---------|---------|---------|-------|-------|------------------------------------------|---------------------------|-------|---------|---------|---------|-------|
|                                          | Site                      | 2001-05 | 2006-10 | 2011-15 | 2020  | 2025  |                                          | 2030                      | Site  | 2001-05 | 2006-10 | 2011-15 | 2020  |
| Lung and Bronchus (C33-C34)              | 148.7                     | 136.5   | 121.6   | 105.0   | 90.5  | 78.3  | Breast (C50)                             | 111.7                     | 101.6 | 107.4   | 114.4   | 119.1   | 121.9 |
| Colorectal (C18-C21)                     | 95.7                      | 97.2    | 101.2   | 104.1   | 105.3 | 104.8 | Colorectal (C18-C21)                     | 56.3                      | 54.5  | 56.5    | 59.0    | 60.4    | 61.0  |
| Prostate (C61)                           | 64.5                      | 66.9    | 76.7    | 85.7    | 91.7  | 94.4  | Lung and Bronchus (C33-C34)              | 54.5                      | 57.1  | 59.6    | 59.6    | 57.6    | 54.0  |
| Oral cavity and pharynx (C00-C14)        | 59.0                      | 53.6    | 49.8    | 44.1    | 38.6  | 33.9  | Corpus uteri (C54)                       | 18.0                      | 17.5  | 20.7    | 22.0    | 22.9    | 23.3  |
| Bladder (C67)                            | 34.8                      | 36.8    | 39.9    | 41.5    | 41.9  | 41.2  | Cervix uteri (C53)                       | 21.0                      | 17.3  | 17.9    | 18.6    | 18.7    | 18.5  |
| Stomach (C16)                            | 28.9                      | 26.4    | 23.6    | 21.0    | 19.1  | 17.6  | Ovary (C56)                              | 17.9                      | 17.1  | 19.0    | 19.5    | 19.6    | 19.6  |
| Kidney (C64)                             | 21.1                      | 22.3    | 24.4    | 26.4    | 27.4  | 27.7  | Stomach (C16)                            | 13.8                      | 12.8  | 11.7    | 10.8    | 10.2    | 9.7   |
| Pancreas (C25)                           | 19.1                      | 21.7    | 22.5    | 23.8    | 24.2  | 23.8  | Pancreas (C25)                           | 11.7                      | 14.1  | 15.4    | 17.2    | 18.4    | 19.0  |
| Larynx (C32)                             | 22.8                      | 19.9    | 18.7    | 15.6    | 12.7  | 10.3  | Oral cavity and pharynx (C00-C14)        | 13.4                      | 13.2  | 14.1    | 14.6    | 14.5    | 14.0  |
| Brain (C71)                              | 17.3                      | 18.0    | 17.3    | 16.9    | 16.2  | 15.4  | Brain (C71)                              | 13.3                      | 13.0  | 12.7    | 12.3    | 11.9    | 11.4  |
| Leukemia (C91-C95)                       | 16.7                      | 16.3    | 18.5    | 19.2    | 19.5  | 19.6  | Melanoma of skin (C43)                   | 13.3                      | 15.7  | 17.5    | 19.7    | 21.1    | 21.8  |
| Melanoma of skin (C43)                   | 13.8                      | 17.0    | 20.0    | 23.3    | 25.3  | 26.4  | Bladder (C67)                            | 10.5                      | 11.0  | 13.0    | 14.0    | 14.5    | 14.4  |
| Liver (C22)                              | 13.0                      | 16.2    | 17.0    | 17.1    | 17.1  | 16.7  | Leukemia (C91-C95)                       | 11.0                      | 10.4  | 11.6    | 11.5    | 11.4    | 11.1  |
| Non-Hodgkin Lymphoma (C82-C85, C88, C96) | 12.8                      | 14.4    | 15.7    | 17.0    | 17.7  | 18.1  | Kidney (C64)                             | 10.9                      | 11.6  | 12.7    | 13.6    | 14.2    | 14.4  |
| Esophagus (C15)                          | 14.5                      | 13.0    | 12.1    | 10.3    | 8.7   | 7.3   | Gallbladder and biliary tract (C23-C24)  | 8.1                       | 8.0   | 7.3     | 7.2     | 7.2     | 7.3   |
| Testis (C62)                             | 9.7                       | 10.9    | 11.7    | 12.6    | 13.2  | 13.5  | Non-Hodgkin Lymphoma (C82-C85, C88, C96) | 9.8                       | 11.2  | 12.9    | 14.3    | 15.0    | 15.1  |
| Gallbladder and biliary tract (C23-C24)  | 7.5                       | 8.0     | 8.2     | 8.6     | 8.9   | 9.1   | Liver (C22)                              | 6.5                       | 7.8   | 7.9     | 8.1     | 8.1     | 8.0   |
| Soft tissue (C47, C49)                   | 7.4                       | 11.7    | 13.7    | 16.1    | 17.5  | 18.3  | Soft tissue (C47, C49)                   | 5.7                       | 9.2   | 10.8    | 12.9    | 14.7    | 16.0  |
| Bones and joints (C40-C41)               | 7.1                       | 7.7     | 6.6     | 6.3     | 6.1   | 6.0   | Thyroid (C73)                            | 6.3                       | 7.0   | 9.7     | 11.6    | 13.5    | 15.1  |
| Thyroid (C73)                            | 2.4                       | 2.6     | 3.3     | 3.8     | 4.4   | 4.8   | Bones and joints (C40-C41)               | 4.8                       | 5.2   | 4.3     | 4.1     | 4.0     | 3.9   |

**Table S2.** Cancer mortality as crude rates (A) and ASR: standardized to the Hungarian population based on the 2011 census (B); standardized to the 2013 ESP (C); and standardized to the 1976 ESP (D) of major cancer types by sex.

A)

| Male                                     | Mortality - crude rate |         |         |         |       |       |       | Female                                   | Mortality - crude rate |         |         |         |      |      |      |
|------------------------------------------|------------------------|---------|---------|---------|-------|-------|-------|------------------------------------------|------------------------|---------|---------|---------|------|------|------|
| Site                                     | 1996-2000              | 2001-05 | 2006-10 | 2011-15 | 2020  | 2025  | 2030  | Site                                     | 1996-2000              | 2001-05 | 2006-10 | 2011-15 | 2020 | 2025 | 2030 |
| Lung and Bronchus (C33-C34)              | 118.9                  | 118.0   | 117.4   | 116.8   | 118.5 | 117.0 | 115.6 | Colorectal (C18-C21)                     | 42.7                   | 41.7    | 41.5    | 42.8    | 46.3 | 49.9 | 54.2 |
| Colorectal (C18-C21)                     | 51.6                   | 54.6    | 55.4    | 60.1    | 69.6  | 78.1  | 87.4  | Breast (C50)                             | 43.5                   | 42.1    | 39.4    | 41.3    | 44.5 | 47.3 | 50.4 |
| Prostate (C61)                           | 28.7                   | 26.2    | 24.9    | 25.7    | 30.6  | 35.9  | 43.0  | Lung and Bronchus (C33-C34)              | 37.6                   | 42.9    | 50.4    | 61.4    | 72.5 | 81.1 | 87.4 |
| Stomach (C16)                            | 27.4                   | 24.1    | 21.2    | 19.7    | 19.7  | 20.1  | 21.2  | Stomach (C16)                            | 18.3                   | 15.6    | 14.1    | 13.5    | 13.6 | 14.1 | 15.2 |
| Oral cavity and pharynx (C00-C14)        | 27.5                   | 29.2    | 27.1    | 25.0    | 22.3  | 19.5  | 17.3  | Pancreas (C25)                           | 14.3                   | 15.4    | 17.4    | 19.5    | 22.4 | 25.0 | 27.7 |
| Pancreas (C25)                           | 16.4                   | 17.0    | 18.1    | 20.1    | 23.1  | 25.6  | 27.8  | Gallbladder and biliary tract (C23-C24)  | 12.3                   | 10.6    | 8.4     | 7.8     | 7.7  | 7.7  | 8.2  |
| Bladder (C67)                            | 12.1                   | 12.4    | 12.3    | 13.9    | 16.7  | 19.2  | 22.1  | Ovary (C56)                              | 11.4                   | 12.0    | 12.6    | 13.8    | 15.2 | 16.4 | 17.4 |
| Esophagus (C15)                          | 12.4                   | 11.5    | 10.8    | 9.9     | 9.0   | 8.1   | 7.4   | Cervix uteri (C53)                       | 9.5                    | 9.1     | 7.7     | 8.2     | 8.9  | 9.5  | 10.1 |
| Liver (C22)                              | 11.5                   | 12.0    | 9.9     | 11.9    | 13.0  | 14.0  | 14.8  | Leukemia (C91-C95)                       | 8.2                    | 9.0     | 8.3     | 8.6     | 9.3  | 9.9  | 10.5 |
| Larynx (C32)                             | 11.5                   | 10.7    | 10.4    | 9.7     | 9.1   | 8.2   | 7.5   | Liver (C22)                              | 7.3                    | 6.4     | 4.9     | 5.5     | 6.2  | 7.1  | 8.1  |
| Leukemia (C91-C95)                       | 10.6                   | 10.5    | 9.8     | 10.1    | 11.1  | 12.0  | 13.1  | Corpus uteri (C54)                       | 7.0                    | 6.1     | 4.4     | 5.6     | 5.5  | 5.4  | 5.6  |
| Kidney (C64)                             | 9.3                    | 8.8     | 9.0     | 9.6     | 10.8  | 11.8  | 12.8  | Brain (C71)                              | 6.6                    | 6.3     | 5.4     | 5.9     | 6.5  | 7.0  | 7.4  |
| Brain (C71)                              | 7.7                    | 7.2     | 6.1     | 6.7     | 7.4   | 7.9   | 8.4   | Kidney (C64)                             | 5.8                    | 5.4     | 4.9     | 5.8     | 6.9  | 7.9  | 8.9  |
| Non-Hodgkin Lymphoma (C82-C85, C88, C96) | 6.3                    | 6.3     | 6.1     | 6.4     | 7.2   | 7.8   | 8.6   | Non-Hodgkin Lymphoma (C82-C85, C88, C96) | 5.4                    | 5.0     | 5.1     | 5.4     | 5.6  | 5.8  | 6.4  |
| Gallbladder and biliary tract (C23-C24)  | 5.5                    | 5.2     | 4.6     | 4.7     | 5.2   | 5.8   | 6.7   | Oral cavity and pharynx (C00-C14)        | 4.5                    | 5.4     | 5.3     | 5.7     | 6.1  | 6.5  | 6.8  |
| Melanoma of skin (C43)                   | 3.2                    | 3.7     | 4.0     | 4.3     | 5.0   | 5.4   | 5.8   | Bladder (C67)                            | 4.0                    | 4.2     | 4.7     | 5.4     | 6.2  | 7.1  | 8.2  |
| Multiple myeloma (C90)                   | 2.7                    | 2.7     | 2.4     | 2.6     | 2.9   | 3.1   | 3.3   | Multiple myeloma (C90)                   | 3.0                    | 3.1     | 2.6     | 2.8     | 3.3  | 3.6  | 3.9  |
| Bones and joints (C40-C41)               | 1.7                    | 1.2     | 0.5     | 0.5     | 0.4   | 0.3   | 0.3   | Melanoma of skin (C43)                   | 2.6                    | 3.0     | 2.7     | 3.1     | 3.3  | 3.6  | 3.9  |
| Hodgkin lymphoma (C81)                   | 1.1                    | 0.7     | 0.4     | 0.5     | 0.6   | 0.6   | 0.7   | Bones and joints (C40-C41)               | 1.1                    | 0.8     | 0.5     | 0.3     | 0.3  | 0.2  | 0.2  |

B)

| Male                        | Mortality, ASR (based on Hungarian male population, 2011 census) |         |         |         |       |      |      | Female                      | Mortality, ASR (based on Hungarian female population, 2011 census) |         |         |         |      |      |      |
|-----------------------------|------------------------------------------------------------------|---------|---------|---------|-------|------|------|-----------------------------|--------------------------------------------------------------------|---------|---------|---------|------|------|------|
| Site                        | 1996-2000                                                        | 2001-05 | 2006-10 | 2011-15 | 2020  | 2025 | 2030 | Site                        | 1996-2000                                                          | 2001-05 | 2006-10 | 2011-15 | 2020 | 2025 | 2030 |
| Lung and Bronchus (C33-C34) | 138.9                                                            | 131.2   | 125.2   | 116.4   | 104.9 | 94.1 | 84.7 | Colorectal (C18-C21)        | 52.7                                                               | 47.6    | 43.7    | 42.1    | 41.0 | 40.7 | 40.9 |
| Colorectal (C18-C21)        | 61.9                                                             | 61.6    | 58.9    | 59.6    | 59.6  | 59.9 | 60.2 | Breast (C50)                | 51.2                                                               | 46.7    | 41.2    | 40.8    | 40.1 | 39.6 | 39.4 |
| Prostate (C61)              | 35.9                                                             | 30.2    | 26.3    | 25.3    | 25.1  | 25.6 | 26.5 | Lung and Bronchus (C33-C34) | 43.3                                                               | 46.7    | 52.5    | 61.0    | 66.6 | 69.6 | 69.6 |

|                                          |      |      |      |      |      |      |      |                                          |      |      |      |      |      |      |      |
|------------------------------------------|------|------|------|------|------|------|------|------------------------------------------|------|------|------|------|------|------|------|
| Stomach (C16)                            | 32.7 | 27.1 | 22.5 | 19.6 | 17.1 | 15.7 | 15.0 | Stomach (C16)                            | 22.6 | 17.8 | 14.9 | 13.3 | 12.0 | 11.5 | 11.5 |
| Oral cavity and pharynx (C00–C14)        | 30.7 | 31.1 | 28.4 | 25.2 | 20.9 | 16.9 | 13.6 | Pancreas (C25)                           | 17.2 | 17.3 | 18.3 | 19.2 | 19.9 | 20.5 | 20.8 |
| Pancreas (C25)                           | 19.4 | 18.9 | 19.3 | 20.0 | 20.2 | 20.2 | 19.9 | Gallbladder and biliary tract (C23-C24)  | 15.0 | 12.1 | 8.8  | 7.7  | 6.8  | 6.3  | 6.3  |
| Bladder (C67)                            | 14.7 | 14.1 | 13.1 | 13.7 | 14.0 | 14.2 | 14.3 | Ovary (C56)                              | 13.3 | 13.2 | 13.1 | 13.7 | 13.8 | 14.0 | 14.0 |
| Esophagus (C15)                          | 14.2 | 12.5 | 11.4 | 9.9  | 8.2  | 6.7  | 5.6  | Cervix uteri (C53)                       | 10.6 | 9.7  | 8.0  | 8.2  | 8.4  | 8.6  | 8.8  |
| Liver (C22)                              | 13.6 | 13.4 | 10.5 | 11.8 | 11.5 | 11.2 | 10.7 | Leukemia (C91-C95)                       | 9.7  | 10.1 | 8.6  | 8.5  | 8.3  | 8.2  | 8.0  |
| Larynx (C32)                             | 13.1 | 11.7 | 11.0 | 9.7  | 8.3  | 6.9  | 5.7  | Liver (C22)                              | 8.7  | 7.2  | 5.2  | 5.4  | 5.6  | 5.9  | 6.2  |
| Leukemia (C91-C95)                       | 12.4 | 11.7 | 10.3 | 10.0 | 9.7  | 9.5  | 9.3  | Corpus uteri (C54)                       | 8.4  | 6.9  | 4.7  | 5.5  | 4.9  | 4.5  | 4.3  |
| Kidney (C64)                             | 11.0 | 9.8  | 9.6  | 9.5  | 9.4  | 9.4  | 9.3  | Brain (C71)                              | 7.5  | 6.8  | 5.7  | 5.8  | 6.0  | 6.2  | 6.3  |
| Brain (C71)                              | 8.7  | 7.7  | 6.5  | 6.7  | 6.8  | 6.9  | 6.9  | Kidney (C64)                             | 6.9  | 6.1  | 5.2  | 5.7  | 6.1  | 6.5  | 6.8  |
| Non-Hodgkin Lymphoma (C82-C85, C88, C96) | 7.3  | 7.0  | 6.4  | 6.4  | 6.2  | 6.1  | 6.1  | Non-Hodgkin Lymphoma (C82-C85, C88, C96) | 6.3  | 5.6  | 5.3  | 5.4  | 4.9  | 4.8  | 4.9  |
| Gallbladder and biliary tract (C23-C24)  | 6.6  | 5.9  | 4.8  | 4.7  | 4.5  | 4.5  | 4.7  | Oral cavity and pharynx (C00–C14)        | 5.0  | 5.8  | 5.5  | 5.7  | 5.7  | 5.5  | 5.4  |
| Melanoma of skin (C43)                   | 3.7  | 4.1  | 4.2  | 4.3  | 4.4  | 4.3  | 4.2  | Bladder (C67)                            | 5.0  | 4.9  | 4.9  | 5.3  | 5.5  | 5.7  | 6.0  |
| Multiple myeloma (C90)                   | 3.2  | 3.1  | 2.6  | 2.6  | 2.5  | 2.4  | 2.4  | Multiple myeloma (C90)                   | 3.5  | 3.4  | 2.7  | 2.8  | 2.9  | 3.0  | 3.1  |
| Bones and joints (C40-C41)               | 1.9  | 1.3  | 0.6  | 0.5  | 0.3  | 0.3  | 0.3  | Melanoma of skin (C43)                   | 3.1  | 3.3  | 2.8  | 3.1  | 3.0  | 3.0  | 3.0  |
| Hodgkin lymphoma (C81)                   | 1.2  | 0.8  | 0.4  | 0.5  | 0.5  | 0.6  | 0.6  | Bones and joints (C40-C41)               | 1.3  | 0.9  | 0.5  | 0.3  | 0.2  | 0.2  | 0.2  |

C)

| Male                                     | Mortality, ASR (ESP 2013) |           |         |         |         |       |       | Female                                   | Mortality, ASR (ESP 2013) |      |           |         |         |         |      |
|------------------------------------------|---------------------------|-----------|---------|---------|---------|-------|-------|------------------------------------------|---------------------------|------|-----------|---------|---------|---------|------|
|                                          | Site                      | 1996-2000 | 2001-05 | 2006-10 | 2011-15 | 2020  | 2025  |                                          | 2030                      | Site | 1996-2000 | 2001-05 | 2006-10 | 2011-15 | 2020 |
| Lung and Bronchus (C33-C34)              | 168.7                     | 159.3     | 151.5   | 142.1   | 129.9   | 119.8 | 110.4 | Colorectal (C18–C21)                     | 50.2                      | 45.3 | 41.5      | 40.1    | 39.0    | 38.7    | 38.8 |
| Colorectal (C18–C21)                     | 87.4                      | 85.9      | 81.6    | 83.1    | 82.8    | 83.6  | 84.5  | Breast (C50)                             | 49.0                      | 44.5 | 39.2      | 38.9    | 38.2    | 37.9    | 37.7 |
| Prostate (C61)                           | 60.4                      | 49.8      | 43.2    | 41.5    | 40.4    | 40.8  | 42.5  | Lung and Bronchus (C33-C34)              | 41.2                      | 44.4 | 49.6      | 57.1    | 62.2    | 65.3    | 65.6 |
| Stomach (C16)                            | 45.5                      | 37.6      | 30.9    | 27.3    | 23.3    | 21.4  | 20.4  | Stomach (C16)                            | 21.7                      | 17.0 | 14.1      | 12.7    | 11.5    | 11.0    | 10.9 |
| Oral cavity and pharynx (C00–C14)        | 33.6                      | 33.4      | 30.4    | 27.1    | 23.0    | 19.4  | 16.5  | Pancreas (C25)                           | 16.4                      | 16.5 | 17.3      | 18.2    | 18.9    | 19.4    | 19.7 |
| Pancreas (C25)                           | 25.4                      | 24.5      | 24.4    | 26.0    | 26.2    | 26.7  | 26.7  | Gallbladder and biliary tract (C23-C24)  | 14.2                      | 11.5 | 8.3       | 7.3     | 6.4     | 6.0     | 5.9  |
| Bladder (C67)                            | 22.2                      | 20.8      | 19.3    | 20.5    | 20.9    | 21.2  | 21.6  | Ovary (C56)                              | 12.6                      | 12.5 | 12.4      | 13.0    | 13.1    | 13.3    | 13.3 |
| Liver (C22)                              | 18.1                      | 17.1      | 13.3    | 15.0    | 14.4    | 14.4  | 14.2  | Cervix uteri (C53)                       | 10.2                      | 9.4  | 7.7       | 7.9     | 8.0     | 8.2     | 8.4  |
| Leukemia (C91-C95)                       | 16.9                      | 16.2      | 14.0    | 13.8    | 13.3    | 13.0  | 12.7  | Leukemia (C91-C95)                       | 9.3                       | 9.6  | 8.2       | 8.1     | 7.9     | 7.8     | 7.7  |
| Esophagus (C15)                          | 15.7                      | 14.0      | 12.8    | 11.3    | 9.6     | 8.2   | 7.0   | Liver (C22)                              | 8.3                       | 6.9  | 4.9       | 5.1     | 5.3     | 5.6     | 5.8  |
| Larynx (C32)                             | 14.9                      | 13.2      | 12.3    | 11.1    | 9.6     | 8.3   | 7.2   | Corpus uteri (C54)                       | 8.0                       | 6.5  | 4.4       | 5.2     | 4.6     | 4.3     | 4.1  |
| Kidney (C64)                             | 14.6                      | 12.8      | 12.5    | 12.6    | 12.4    | 12.4  | 12.3  | Brain (C71)                              | 7.1                       | 6.5  | 5.4       | 5.6     | 5.7     | 5.8     | 5.9  |
| Brain (C71)                              | 10.0                      | 8.9       | 7.5     | 7.9     | 7.9     | 8.0   | 8.0   | Kidney (C64)                             | 6.6                       | 5.8  | 4.9       | 5.4     | 5.8     | 6.2     | 6.4  |
| Non-Hodgkin Lymphoma (C82-C85, C88, C96) | 9.6                       | 9.1       | 8.6     | 8.5     | 8.4     | 8.3   | 8.3   | Non-Hodgkin Lymphoma (C82-C85, C88, C96) | 6.0                       | 5.3  | 5.1       | 5.1     | 4.7     | 4.5     | 4.6  |
| Gallbladder and biliary tract (C23-C24)  | 9.6                       | 8.5       | 6.9     | 6.5     | 6.3     | 6.2   | 6.4   | Oral cavity and pharynx (C00–C14)        | 4.9                       | 5.6  | 5.2       | 5.3     | 5.3     | 5.3     | 5.1  |

|                            |     |     |     |     |     |     |     |                            |     |     |     |     |     |     |     |
|----------------------------|-----|-----|-----|-----|-----|-----|-----|----------------------------|-----|-----|-----|-----|-----|-----|-----|
| Melanoma of skin (C43)     | 4.6 | 5.2 | 5.4 | 5.6 | 5.8 | 5.8 | 5.7 | Bladder (C67)              | 4.8 | 4.6 | 4.7 | 5.0 | 5.2 | 5.4 | 5.7 |
| Multiple myeloma (C90)     | 4.3 | 4.1 | 3.4 | 3.5 | 3.3 | 3.2 | 3.2 | Multiple myeloma (C90)     | 3.3 | 3.2 | 2.6 | 2.6 | 2.8 | 2.9 | 2.9 |
| Bones and joints (C40-C41) | 2.3 | 1.6 | 0.7 | 0.6 | 0.4 | 0.3 | 0.3 | Melanoma of skin (C43)     | 3.0 | 3.1 | 2.7 | 2.9 | 2.9 | 2.9 | 2.9 |
| Hodgkin lymphoma (C81)     | 1.4 | 0.9 | 0.5 | 0.5 | 0.6 | 0.6 | 0.7 | Bones and joints (C40-C41) | 1.3 | 0.8 | 0.5 | 0.3 | 0.2 | 0.2 | 0.2 |

**D)**

| Male                                     | Mortality, ASR (ESP 1976) |         |         |         |      |      |      | Female                                   | Mortality, ASR (ESP 1976) |         |         |         |      |      |      |
|------------------------------------------|---------------------------|---------|---------|---------|------|------|------|------------------------------------------|---------------------------|---------|---------|---------|------|------|------|
|                                          | 1996-2000                 | 2001-05 | 2006-10 | 2011-15 | 2020 | 2025 | 2030 |                                          | 1996-2000                 | 2001-05 | 2006-10 | 2011-15 | 2020 | 2025 | 2030 |
| <b>Site</b>                              |                           |         |         |         |      |      |      | <b>Site</b>                              |                           |         |         |         |      |      |      |
| Lung and Bronchus (C33-C34)              | 118.7                     | 111.6   | 105.9   | 97.6    | 87.5 | 78.6 | 70.7 | Colorectal (C18-C21)                     | 29.2                      | 26.6    | 24.8    | 23.9    | 23.5 | 23.5 | 23.7 |
| Colorectal (C18-C21)                     | 52.1                      | 51.6    | 49.5    | 49.9    | 49.9 | 50.1 | 50.2 | Breast (C50)                             | 33.4                      | 30.4    | 26.7    | 26.0    | 25.5 | 25.1 | 25.1 |
| Prostate (C61)                           | 30.1                      | 25.2    | 22.0    | 21.2    | 20.9 | 21.2 | 22.0 | Lung and Bronchus (C33-C34)              | 29.1                      | 31.8    | 36.3    | 40.8    | 43.4 | 43.7 | 42.0 |
| Stomach (C16)                            | 27.6                      | 22.8    | 19.0    | 16.5    | 14.4 | 13.2 | 12.7 | Stomach (C16)                            | 12.5                      | 10.0    | 8.5     | 7.7     | 7.0  | 6.7  | 6.7  |
| Oral cavity and pharynx (C00-C14)        | 27.6                      | 28.0    | 25.2    | 21.9    | 17.8 | 14.3 | 11.6 | Pancreas (C25)                           | 10.0                      | 10.0    | 10.7    | 11.2    | 11.5 | 11.7 | 11.7 |
| Pancreas (C25)                           | 16.5                      | 16.1    | 16.3    | 16.8    | 16.9 | 17.0 | 16.7 | Gallbladder and biliary tract (C23-C24)  | 8.3                       | 6.6     | 4.8     | 4.2     | 3.8  | 3.6  | 3.7  |
| Bladder (C67)                            | 12.4                      | 11.9    | 11.0    | 11.5    | 11.7 | 11.9 | 12.0 | Ovary (C56)                              | 8.7                       | 8.6     | 8.5     | 9.0     | 9.0  | 9.0  | 9.0  |
| Esophagus (C15)                          | 12.4                      | 11.0    | 9.9     | 8.4     | 6.9  | 5.7  | 4.7  | Cervix uteri (C53)                       | 7.9                       | 7.5     | 6.2     | 6.2     | 6.3  | 6.4  | 6.4  |
| Liver (C22)                              | 3.2                       | 3.5     | 3.6     | 3.7     | 3.7  | 3.7  | 3.5  | Leukemia (C91-C95)                       | 6.1                       | 6.2     | 5.3     | 5.2     | 5.1  | 5.0  | 4.8  |
| Larynx (C32)                             | 11.5                      | 10.2    | 9.5     | 8.3     | 7.0  | 5.8  | 4.8  | Liver (C22)                              | 5.1                       | 4.2     | 3.0     | 3.2     | 3.3  | 3.5  | 3.5  |
| Leukemia (C91-C95)                       | 10.7                      | 10.0    | 8.9     | 8.6     | 8.3  | 8.1  | 7.9  | Corpus uteri (C54)                       | 5.0                       | 4.0     | 2.8     | 3.3     | 2.9  | 2.7  | 2.5  |
| Kidney (C64)                             | 9.3                       | 8.4     | 8.1     | 8.1     | 8.0  | 7.9  | 7.8  | Brain (C71)                              | 5.4                       | 4.9     | 4.0     | 4.1     | 4.2  | 4.3  | 4.4  |
| Brain (C71)                              | 7.7                       | 6.9     | 5.7     | 5.8     | 5.9  | 6.0  | 6.1  | Kidney (C64)                             | 4.1                       | 3.5     | 3.0     | 3.3     | 3.6  | 3.8  | 4.0  |
| Non-Hodgkin Lymphoma (C82-C85, C88, C96) | 6.3                       | 6.0     | 5.5     | 5.4     | 5.3  | 5.2  | 5.2  | Non-Hodgkin Lymphoma (C82-C85, C88, C96) | 3.9                       | 3.4     | 3.2     | 3.2     | 2.9  | 2.8  | 2.8  |
| Gallbladder and biliary tract (C23-C24)  | 5.5                       | 4.9     | 4.0     | 3.9     | 3.8  | 3.8  | 3.9  | Oral cavity and pharynx (C00-C14)        | 3.8                       | 4.5     | 4.1     | 4.0     | 3.9  | 3.6  | 3.4  |
| Melanoma of skin (C43)                   | 3.2                       | 3.5     | 3.6     | 3.7     | 3.7  | 3.7  | 3.6  | Bladder (C67)                            | 2.7                       | 2.6     | 2.8     | 3.0     | 3.1  | 3.2  | 3.2  |
| Multiple myeloma (C90)                   | 2.7                       | 2.6     | 2.2     | 2.1     | 2.1  | 2.0  | 2.0  | Multiple myeloma (C90)                   | 2.1                       | 2.0     | 1.6     | 1.7     | 1.7  | 1.8  | 1.9  |
| Bones and joints (C40-C41)               | 1.7                       | 1.2     | 0.5     | 0.4     | 0.3  | 0.3  | 0.3  | Melanoma of skin (C43)                   | 2.0                       | 2.2     | 1.8     | 1.9     | 1.9  | 1.9  | 1.9  |
| Hodgkin lymphoma (C81)                   | 1.1                       | 0.7     | 0.4     | 0.4     | 0.5  | 0.5  | 0.6  | Bones and joints (C40-C41)               | 0.9                       | 0.6     | 0.3     | 0.2     | 0.2  | 0.2  | 0.2  |

**Table S3.** Percent probability of developing selected types of cancer in specified age bins by sex, comparing Hungary and USA (USA data are adapted from Siegel et al, 2015). Probabilities higher in the Hungarian population by at least 0.3 are marked in red compared to the US values.

|                  |        | age  |     | 50-59 | 50-59 | 60-69 | 60-69 | 70+  | 70+  | 0-99 | 0-99 |
|------------------|--------|------|-----|-------|-------|-------|-------|------|------|------|------|
|                  |        | HUN  | US  | HUN   | US    | HUN   | US    | HUN  | US   | HUN  | US   |
| <b>All sites</b> | male   | 10.8 | 6.5 | 23.3  | 14.5  | 55.7  | 34.6  | 56.9 | 42.1 |      |      |
|                  | female | 9.5  | 6   | 16.5  | 10    | 37.8  | 26.1  | 51.9 | 37.6 |      |      |
| <b>CRC</b>       | male   | 1.3  | 0.7 | 3.2   | 1.2   | 7.7   | 3.7   | 8.8  | 4.7  |      |      |
|                  | female | 0.8  | 0.5 | 1.8   | 0.9   | 5.2   | 3.4   | 6.9  | 4.4  |      |      |
| <b>Lung</b>      | male   | 2.2  | 0.7 | 4.4   | 2     | 6.5   | 6.4   | 9.9  | 7.2  |      |      |
|                  | female | 1.3  | 0.6 | 2.2   | 1.5   | 3.1   | 4.8   | 6.1  | 6    |      |      |
| <b>Pancreas</b>  | male   | 0.4  |     | 0.7   |       | 1.5   |       | 1.9  |      |      |      |
|                  | female | 0.2  |     | 0.5   |       | 1.5   |       | 1.9  |      |      |      |
| <b>Stomach</b>   | male   | 0.3  |     | 0.7   |       | 1.9   |       | 2.1  |      |      |      |
|                  | female | 0.1  |     | 0.3   |       | 1.2   |       | 1.5  |      |      |      |
| <b>Breast</b>    | female | 2.2  | 2.3 | 3.2   | 3.5   | 5.2   | 6.7   | 10.7 | 12.3 |      |      |
| <b>Prostate</b>  | male   | 0.6  | 2.1 | 2.6   | 5.8   | 7.4   | 10    | 6.9  | 14   |      |      |
